# Supplementary material
Source: PubMed Central journal article supplement (PMC10991980)
Supplement: 262_2021_2939_MOESM1_ESM.pdf [file 262_2021_2939_MOESM1_ESM.pdf]

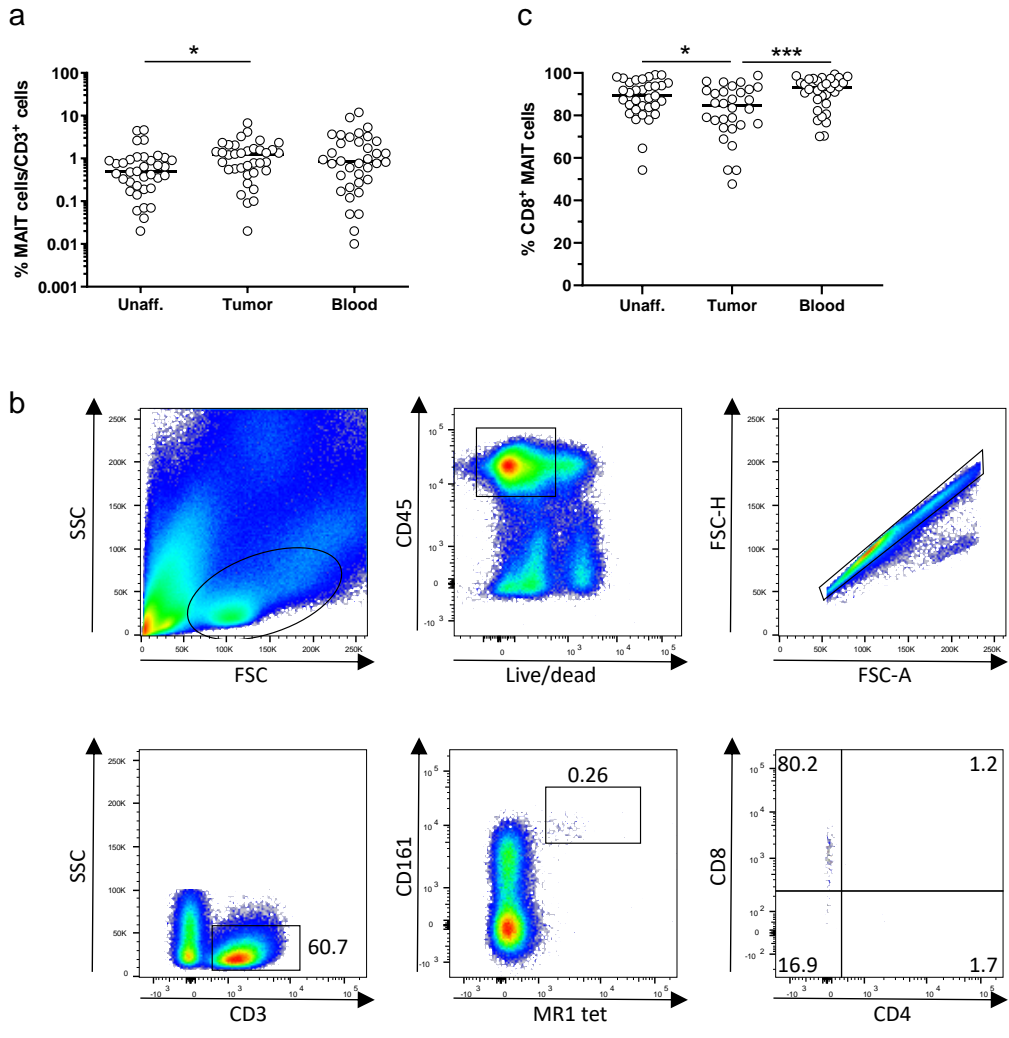

**Supplementary Fig. S1** Gating strategy to identify MAIT cells. (a) Single cell suspensions were isolated from unaffected colon, colon tumors and peripheral blood, and frequencies of MAIT cells among CD3<sup>+</sup> cells determined by flow cytometry. (b) Dot plots show one example of MAIT cell gating using a single cell suspension from a colon tumor. Live, singlet cells from a lymphocyte gate were further gated as CD45<sup>+</sup>CD3<sup>+</sup> T cells, and then V $\alpha$ 7.2 and CD161 or MR1 tetramers were used to identify MAIT cells. (c) Distribution of CD8<sup>+</sup> and DN MAIT cells in cell suspensions from unaffected colon, colon tumors and peripheral blood. Symbols represent individual values. \* p<0.05, \*\*\* p<0.001, using the Friedman test followed by Dunn's post test for multiple comparisons. n=41

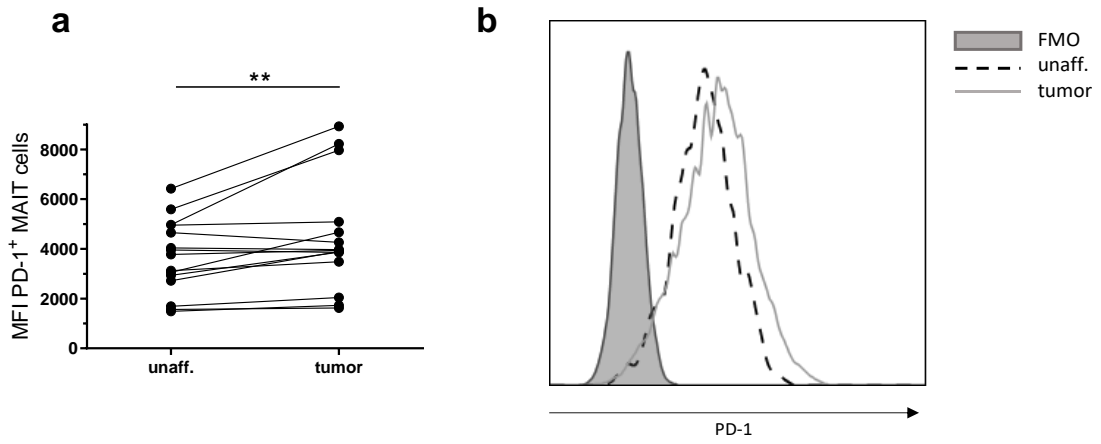

**Supplementary Fig. S2** PD-1 expression in tissue MAIT cells. Single cell suspensions were isolated from unaffected colon and colon tumors, and MAIT cells were analyzed for their expression of PD-1 by flow cytometry. (a) Mean fluorescence intensity (MFI) of PD-1 staining on MAIT cells from unaffected colon and colon tumors. (b) Representative histogram showing PD-1 expression on MAIT cells isolated from a colon tumor and the corresponding unaffected tissue. Symbols represent individual values and the line the median. \*\*  $p < 0.01$ ,  $n = 15$

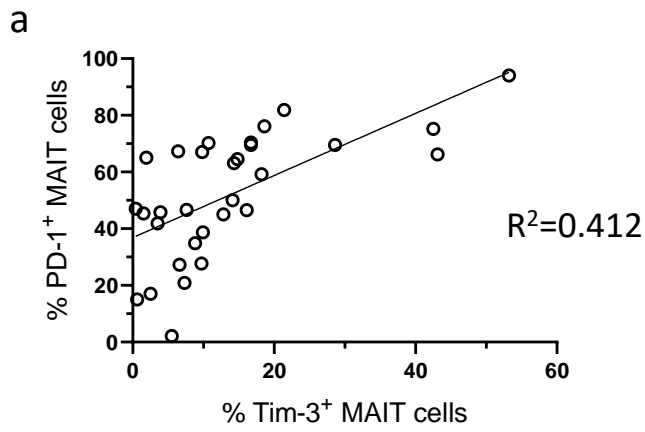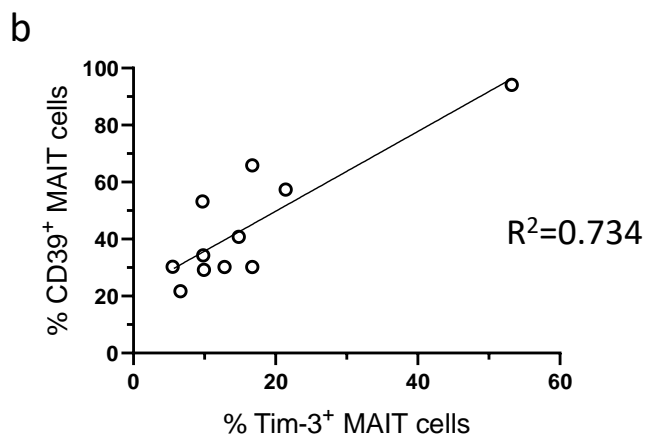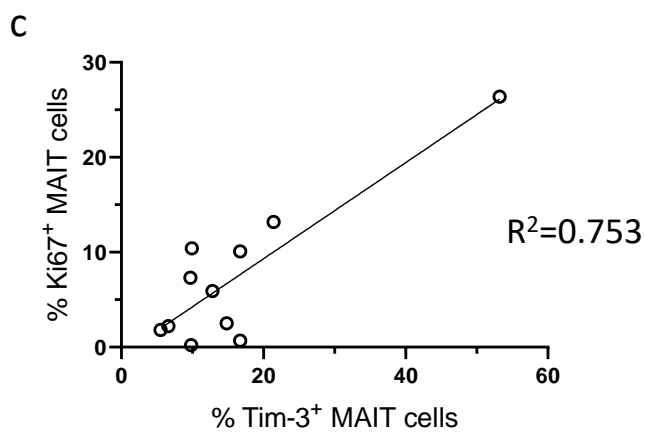

**Supplementary Fig. S3.** Correlation between exhaustion markers in intratumoral MAIT cells. Single cell suspensions were isolated from colon tumors, and expression of Tim-3, PD-1, CD39, and Ki67 by CD8<sup>+</sup> MAIT cells evaluated by flow cytometry. Graphs show correlation between percentage of Tim-3<sup>+</sup> cells and percentage of (a) PD-1<sup>+</sup>, (b) CD39<sup>+</sup>, and (c) Ki67<sup>+</sup> cells using linear regression. n=11-31

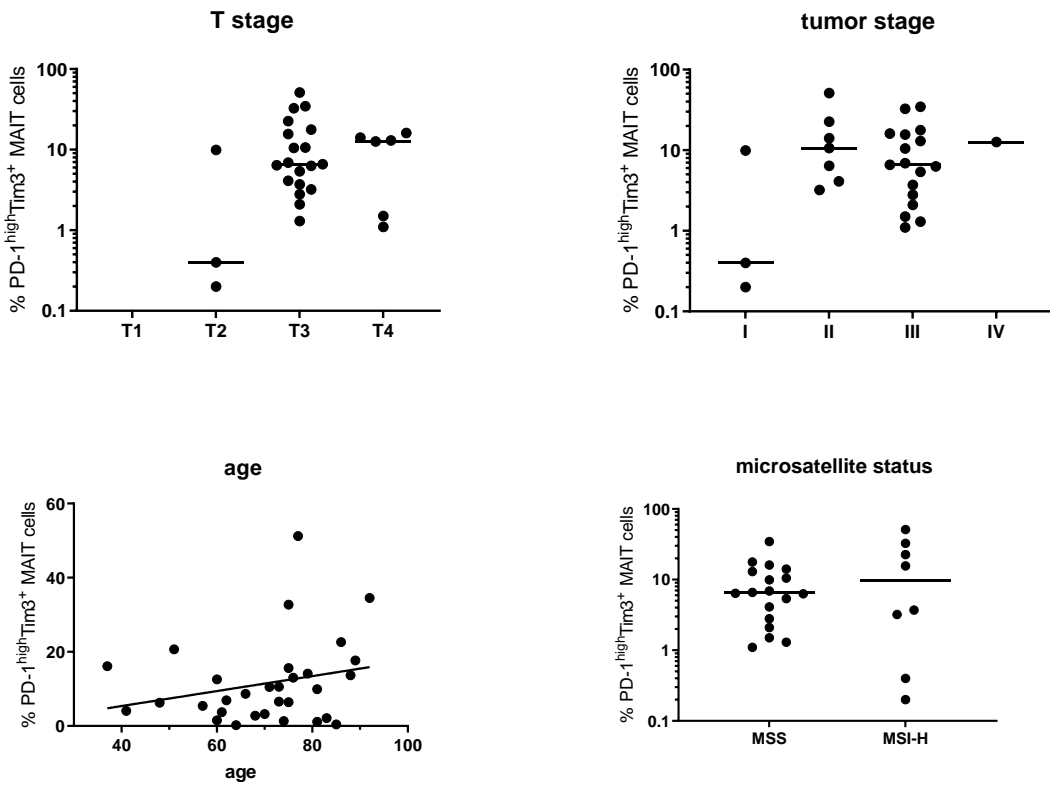

**Supplementary Fig. S4** Frequencies of exhausted MAIT cells in relation to patient and tumor characteristics. Single cell suspensions were prepared from colon tumors, and frequencies of CD8<sup>+</sup> MAIT cells co-expressing PD-1 and Tim-3 determined by flow cytometry in freshly isolated cells. n=26-31

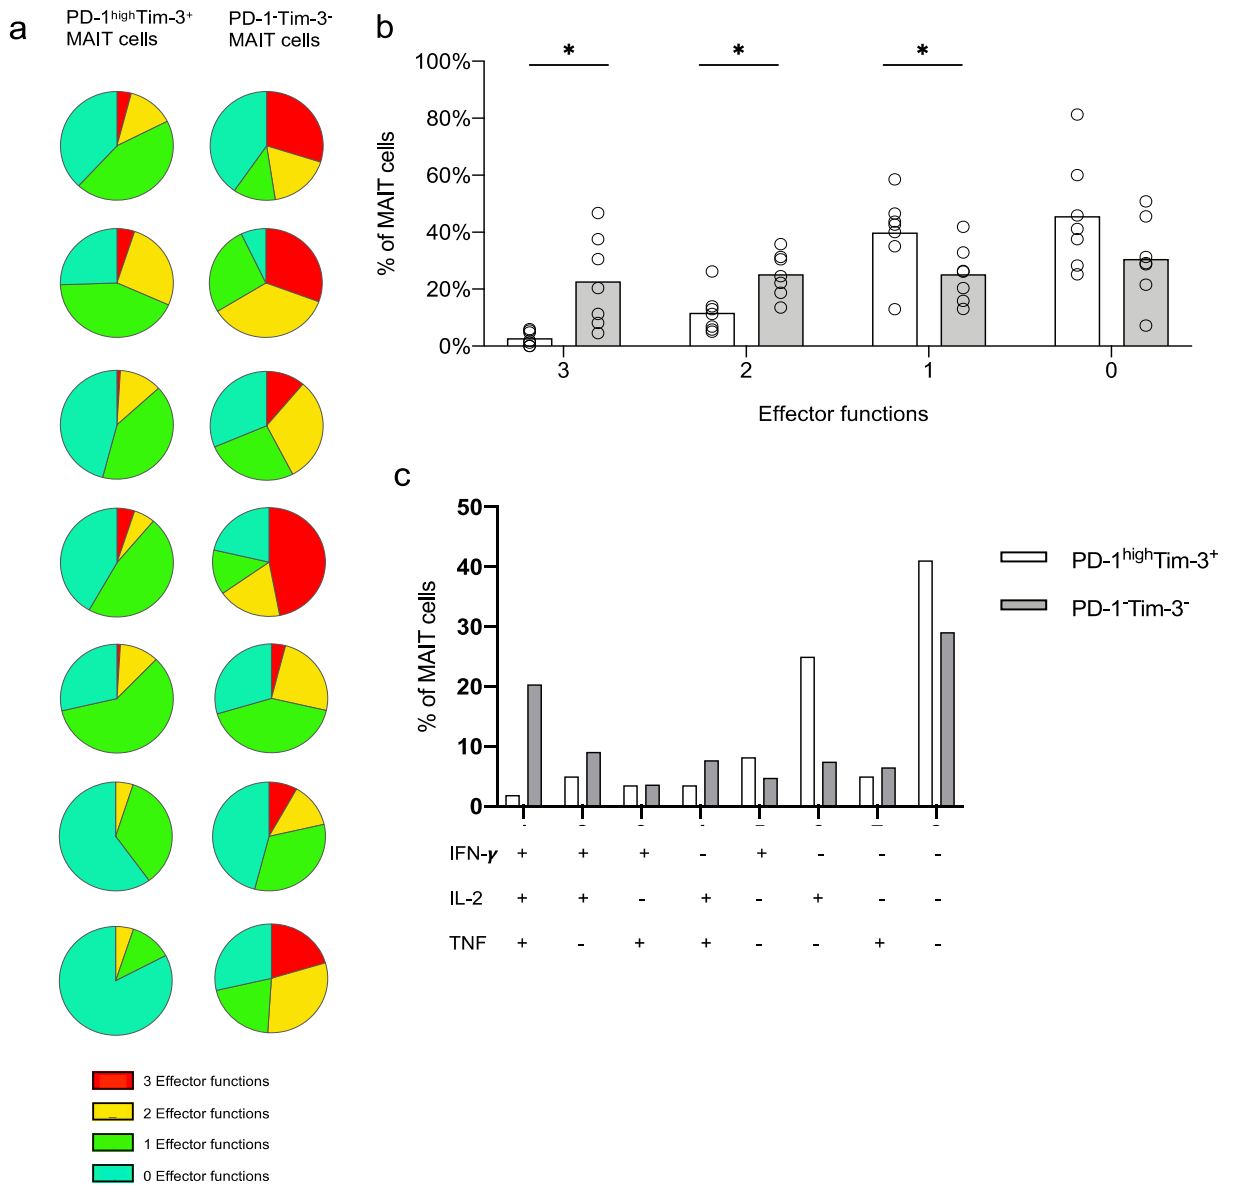

**Supplementary Fig. S5** Polyfunctionality in tumor-infiltrating MAIT cells. Single cell suspensions were isolated from colon tumors, and production of IFN- $\gamma$ , IL-2, and TNF by MAIT cells evaluated in vitro by flow cytometry after polyclonal stimulation with PMA and Ionomycin. (a) Percentage of PD-1<sup>hi</sup>Tim-3<sup>+</sup> and PD-1<sup>-</sup>Tim-3<sup>-</sup> MAIT cells from individual patients expressing 3 (red), 2 (yellow), 1 (green), or 0 (turquoise) of the analyzed cytokines illustrated as pie charts. (b) Frequencies of PD-1<sup>hi</sup>Tim-3<sup>+</sup> (white bars) and PD-1<sup>-</sup>Tim-3<sup>-</sup> (grey bars) MAIT cells expressing 3, 2, 1 or 0 of the analyzed effector molecules, shown as the percentage of total MAIT cells. (c) Frequencies of PD-1<sup>hi</sup>Tim-3<sup>+</sup> (white bars) and PD-1<sup>-</sup>Tim-3<sup>-</sup> (grey bars) MAIT cell subsets expressing a combination of IFN- $\gamma$ , IL-2, and TNF shown as the percentage of total MAIT cells. Symbols represent individual values and bars the mean. \* $<0.05$  using Wilcoxon matched-pairs signed rank test,  $n=7$

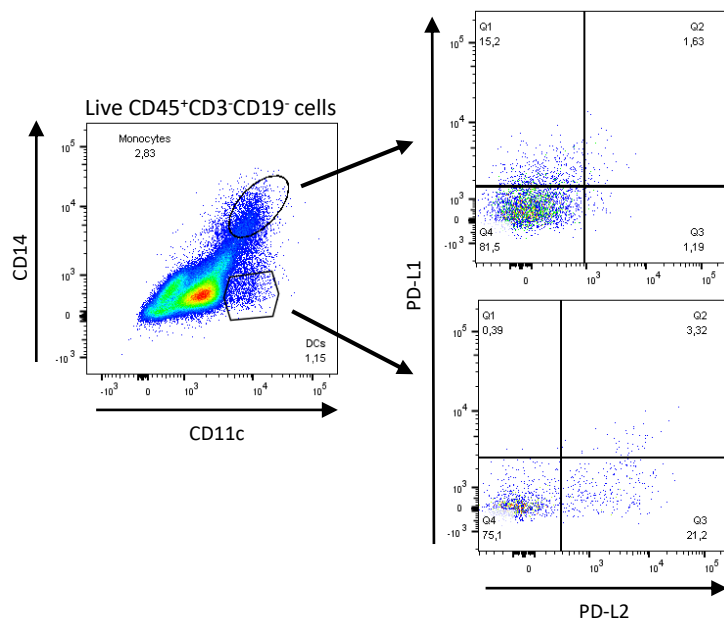

**Supplementary Fig. S6** Representative flow cytometry analysis showing the expression of PD-L1 and PD-L2 among putative monocytes/immature macrophages (CD14<sup>+</sup>CD11c<sup>+</sup>) and dendritic cells (CD14<sup>-</sup>CD11c<sup>+</sup>) gated from live CD45<sup>+</sup>CD3<sup>-</sup>CD19<sup>-</sup> single cells isolated from a colon tumor. Gates are set according to FMO controls gated from the respective cell suspensions.

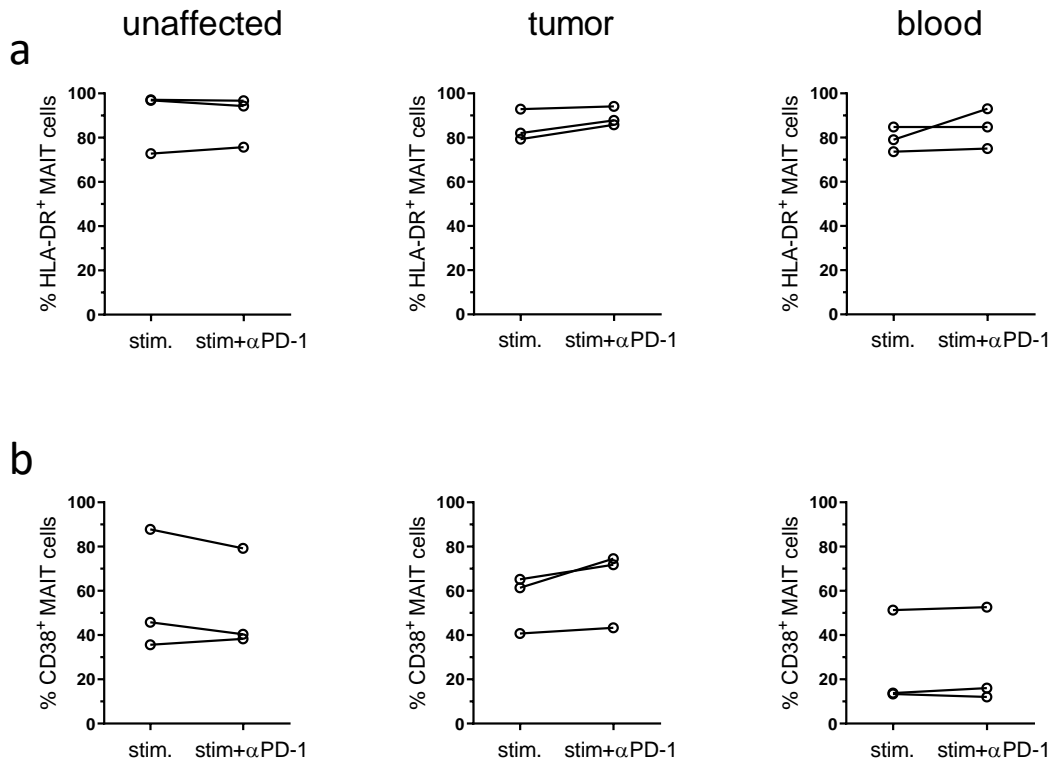

**Supplementary Fig. 7** MAIT cell activation after PD-1 blocking. Single cell suspensions were isolated from unaffected colon, colon tumors and peripheral blood, and stimulated with THP-1 cells pre-incubated with *E. coli* in the presence or absence of blocking antibodies to PD-1. MAIT cell expression of HLA-DR (a) and CD38 (b) was evaluated by flow cytometry. Symbols represent individual values, and are connected to show corresponding values in the same individuals.
