# Supplementary material
Source: PubMed Central journal article supplement (PMC10991980)
Supplement: 262_2021_2939_MOESM2_ESM.pdf [file 262_2021_2939_MOESM2_ESM.pdf]

Supplementary table I. Characteristics of the colon cancer patients included in the study.

|                       |            | females | males |
|-----------------------|------------|---------|-------|
|                       | n          | 19      | 28    |
|                       | age        | 41-92   | 37-88 |
| Tumor location        | ceacum     | 4       | 5     |
|                       | ascending  | 9       | 4     |
|                       | transverse | 4       | 7     |
|                       | descending | -       | 3     |
|                       | sigmoid    | 2       | 9     |
| TNM stage             | I          | 1       | 3     |
|                       | II         | 8       | 9     |
|                       | III        | 10      | 16    |
|                       | IV         | -       | 1     |
| Microsatellite status | MSS        | 7       | 18    |
|                       | MSI-H      | 10      | 4     |
|                       | unknown    | 2       | 6     |
